# Supplementary material
Source: Elsevier journal article supplement (https://www.sciencedirect.com/science/article/pii/S1695403315000934)
Supplement: mmc1 [file S1695403315000934:mmc1.pdf]

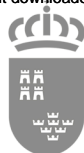

Región de Murcia  
Consejería de Sanidad y Consumo  
Dirección General de Salud Pública

Servicio de Salud Pública de Lorca

Lorca, a 14 de junio de 2010

Estimados padres de

Me dirijo a ustedes para solicitarles su colaboración en el estudio sobre la varicela (payuelas) que enfermeros y médicos del Servicio de Salud Pública de Lorca estamos realizando en el municipio de Totana.

El estudio se realiza en niños de 1 a 12 años y nos servirá para conocer como se desarrolla la enfermedad de la varicela en su municipio y determinar las características que ha tenido la misma en cada caso.

Para el citado estudio necesitamos la colaboración tanto de los padres/tutores de los niños que han padecido la enfermedad, como de los que no la hayan padecido. Es muy importante su colaboración (haya pasado su hijo la enfermedad o no), ya que sus respuestas podrán ayudarnos a comprender en mayor medida el efecto de la varicela (payuelas) y su vacuna en los niños de Totana.

Para su conocimiento, le informamos que el citado estudio ha sido aprobado por el Comité Ético de Investigación Clínica del Hospital Virgen de la Arrixaca en febrero de 2010 y que la información que usted nos facilite será estrictamente confidencial.

Para nosotros es muy importante su colaboración, por lo que le agradecemos de antemano el interés mostrado.

Si tiene alguna duda puede consultarnos en el teléfono 968 46 83 00 extensión 131 o 132 en horario de 9:00 a 14:00 horas

Reciba un cordial saludo.

El Jefe de Servicio Salud Pública

Fdo.: Dr.

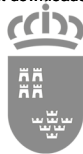

**Región de Murcia**  
Consejería de Sanidad y Consumo  
Dirección General de Salud Pública

## **Encuesta para padres y tutores de los niños/as**

Vamos a realizar un estudio sobre la varicela en Totana, que nos servirá para conocer como se desarrolla la enfermedad de la varicela en el municipio de Totana y para ello necesitamos su colaboración.

- Por favor, complete esta encuesta y devuélvala al maestro de su niño/a antes de 10 días.
- Toda la información será estrictamente confidencial y bajo ningún concepto será difundida con datos individualizados.
- Su participación es completamente voluntaria, si usted no desea responder alguna de las preguntas, no lo haga.
- Los padres o tutores con más de un niño/a en la escuela y/o guardería deben rellenar una encuesta por separado para cada niño.
- Realizar la encuesta apenas le llevará unos minutos.

Muchas gracias.

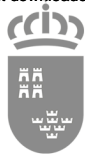

Región de Murcia  
Consejería de Sanidad y Consumo  
Dirección General de Salud Pública

Nombre del niño:

Colegio:

Curso:

1. Nombre de la persona que rellena este formulario: \_\_\_\_\_

2. Relación con el niño/a: ☐ Padre/Madre ☐ Otros (especificar): \_\_\_\_\_

3. ¿Cuándo inició su hijo/a la asistencia a esta escuela/guardería? \_\_\_\_/\_\_\_\_/\_\_\_\_  
Día Mes Año

4. ¿Tiene su hijo/a alguna enfermedad? (Por ejemplo: asma, enfermedad de la piel o alguna enfermedad grave)

- ☐ Sí. Por favor, especifique la enfermedad \_\_\_\_\_
- ☐ No
- ☐ No sé

5. ¿Toma su hijo/a actualmente medicamentos?

- ☐ Sí. Por favor, especifique los nombres de los medicamentos: \_\_\_\_\_
- ☐ No \_\_\_\_\_

6. ¿Ha tenido su hijo/a la enfermedad de la varicela (payuelas)?

- ☐ Sí
- ☐ No
- ☐ No lo sé

7. En caso afirmativo, ¿a qué edad? \_\_\_\_\_ años ó \_\_\_\_\_ meses



Región de Murcia  
Consejería de Sanidad y Consumo  
Dirección General de Salud Pública

8. ¿Ha tenido su hijo/a la varicela (payuelas) durante este curso escolar?

- ☐ Sí  
☐ No  
☐ No lo sé

9. ¿Tiene su hijo/a cartilla de vacunación?

- ☐ Sí  
☐ No

**Compruebe la cartilla de vacunación de su hijo/a para responder a las siguientes preguntas. Si no tiene la cartilla de vacunación, por favor rellene lo que recuerde.**

La vacuna contra la varicela puede estar escrita en el carné de vacunación de su hijo/a como “vacuna contra la varicela” o “VARILRIX” o “VARIVAX”:

10. ¿Ha recibido su hijo la vacuna contra el virus de la varicela?

- ☐ Sí. Por favor, especifique el número de dosis de vacuna recibidas: ☐ 1 dosis  
☐ No ☐ 2 dosis

11. ¿En qué centro sanitario vacunaron a su hijo/a? \_\_\_\_\_

12. ¿Cómo podemos contactar con usted si necesitáramos más información?

Número de Teléfono: \_\_\_\_\_

Mejor hora para llamar: \_\_\_\_\_

**¡GRACIAS POR SU COLABORACIÓN!**
